# Supplementary material
Source: ML conference proceedings conference paper supplement (https://openreview.net/forum?id=eivmdSj9u1)
Supplement: supplementary_material [file attachment]

## Sheet: Subject Information
Number	Gentle	Educational background	Age	Major	Any professional background (or experience) in data visualization？	Familiarity with Sankey Diagrams	Experience with VR Devices
1	Fe	Postgraduate and above	28	Design	Yes	Never heard of it	Some experience (5-10 times)
2	Male	bachelor	28	Law	No	Heard of it, have seen it	A few times (up to 5 times)
3	Fe	Postgraduate and above	24	Industrial Design Engineering	No	Understand the basic concepts and have used it	A few times (up to 5 times)
4	Male	bachelor	23	Flying Vehicle Design and Engineering	Yes	Never heard of it	A few times (up to 5 times)
5	Male	Postgraduate and above	22	Energy Power	No	Never heard of it	A few times (up to 5 times)
6	Male	Postgraduate and above	25	Energy Power	No	Never heard of it	A few times (up to 5 times)
7	Fe	Postgraduate and above	23	Computer Technology	Yes	Never heard of it	A few times (up to 5 times)
8	Fe	bachelor	21	Engineering Mechanics	No	Never heard of it	A few times (up to 5 times)
9	Fe	bachelor	21	Vehicle Engineering	No	Never heard of it	A few times (up to 5 times)
10	Fe	Postgraduate and above	24	Electronic Information	Yes	Never heard of it	A few times (up to 5 times)
11	Male	Postgraduate and above	23	Optical Engineering	Yes	Never heard of it	None
12	Male	Postgraduate and above	24	Software Engineering	Yes	Never heard of it	A few times (up to 5 times)
13	Fe	Postgraduate and above	24	Clinical Medicine	No	Never heard of it	Some experience (5-10 times)
14	Male	Postgraduate and above	25	Control Theory and Control Engineering	Yes	Never heard of it	A few times (up to 5 times)
15	Male	Postgraduate and above	26	Industrial Design Engineering	No	Never heard of it	Frequent use
16	Male	Postgraduate and above	26	Electrical Engineering	No	Never heard of it	A few times (up to 5 times)

## Sheet: Task Performance
Participants	Experimental Order	VRTask1	VRTask2	VRTask3	VRTask4	VRTask5	VRTask6	VRTask7	DTTask1	DTTask2	DTTask3	DTTask4	DTTask5	DTTask6	DTTask7	VRTime1	VRTime2	VRTime3	VRTime4	VRTime5	VRTime6	VRTime7	DTTime1	DTTime2	DTTime3	DTTime4	DTTime5	DTTime6	DTTime7
1	DTE-VRF	1	1	1	1	1	1	1	0	1	1	1	1	1	1	15.56	29.45	26.19	51.19	33.49	26.13	26.26	36.51	53.3	146.16	67.42	106.05	18.69	91.39
2	VRE-DTF	1	1	1	1	1	1	1	1	1	1	1	1	1	1	25.51	22.46	31.51	21.1	29.66	14.48	50.55	17.03	23.08	28.98	30.96	28.56	19.28	17.79
3	VRE-DTF	1	1	1	1	1	1	1	1	1	1	1	1	1	1	17.52	16.88	23.23	20.74	31.3	13.47	33.81	43.42	25.1	20.15	32.92	40.85	18.18	96.8
4	DTF-VRE	1	1	1	1	1	1	1	1	1	1	1	1	1	1	20.35	16.32	36.71	24.07	20.81	22.14	63.25	17.38	14.08	34.46	32.7	39.57	12.22	27.48
5	DTE-VRF	1	1	1	1	1	1	1	1	1	1	1	1	1	1	19.71	21.61	16.5	27.94	38.57	19.12	27.71	81.27	30.51	66.55	81.21	51.17	16.22	109.31
6	VRF-DTE	1	1	1	1	1	1	1	1	1	1	1	1	1	1	21.31	20.56	18.91	45.46	50.84	34.75	41.68	76.3	31.95	44.13	39.4	53.73	26.51	62.05
7	VRF-DTE	1	1	1	1	1	1	1	1	1	1	0	1	0	1	14.34	25.93	11.82	19.91	14.75	17.26	37.07	28.9	13.54	50.72	44.31	28.11	20.88	31.37
8	DTE-VRF	1	1	1	1	1	1	1	1	1	1	1	1	0	0	13.91	13.91	13.82	22.72	28.89	16.58	39.71	28	24.35	64.09	22.24	41.15	16.68	39.55
9	DTE-VRF	1	1	1	1	1	1	1	1	1	1	1	1	1	0	37.16	17.8	17.48	23.45	26.32	20.48	45.82	37.43	25.3	70.55	36.65	42.93	13.43	103.06
10	DTF-VRE	1	1	1	1	1	1	1	1	0	1	1	1	1	1	30.48	27.9	27.98	34.4	33.8	25.61	64.61	29.38	15.22	55.77	54.61	34.49	21.25	25.86
11	VRF-DTE	1	1	1	1	1	1	1	1	1	1	1	1	0	1	24.69	25.58	15.14	65.83	31.64	26.16	59.15	29.23	21.01	51.14	26.02	36.23	55.2	101.76
12	VRE-DTF	1	1	1	1	1	1	1	1	1	1	1	1	1	1	24	20.58	22.27	19.57	27.74	20.36	47.53	31.48	24.91	14.76	32.63	22.39	19.12	22.17
13	DTF-VRE	1	1	1	1	1	1	1	1	1	1	1	1	1	1	16.22	19.53	16.26	20.68	20.84	15.25	112.18	22.32	17.5	27.81	34.64	30.7	18.65	36.65
14	DTF-VRE	1	1	1	1	1	1	1	1	1	1	1	1	1	1	25.15	25.3	27.18	28.11	32.35	20.41	103.31	42.7	36.08	43.73	60.59	49.18	24.02	50.96
15	VRF-DTE	1	1	1	1	1	1	1	1	1	1	1	1	0	1	31.26	28.85	22.89	34	24.07	22.01	49.93	24.47	40.82	54.38	47.6	75.67	16.35	100.4
16	VRE-DTF	1	1	1	1	1	1	1	1	1	1	1	1	1	1	24.71	16.37	21.33	28.74	26.71	18.83	91.98	16.16	19.75	11.95	19.15	26.64	17.02	24.79

## Sheet: NTLX
Participants	VR Mental Demand	VR Physical Demand	VR Temporal Demand	VR Performance	VR Effort	VR Frustration Level	DT Mental Demand	DT Physical Demand	DT Temporal Demand	DT Performance	DT Effort	DT Frustration Level
1	12	4	4	16	12	8	12	4	12	8	16	8
2	8	0	0	20	8	0	12	4	0	20	12	0
3	8	1	1	16	8	2	16	10	1	8	13	8
4	6	2	8	13	4	5	4	1	4	13	4	2
5	8	8	6	19	8	1	10	2	8	14	4	1
6	12	8	12	12	8	4	12	8	8	12	12	4
7	8	8	8	15	8	4	12	4	12	8	16	12
8	10	2	2	14	4	0	12	0	4	10	12	2
9	12	8	8	16	8	4	12	8	12	12	16	12
10	8	6	0	14	10	0	2	0	0	16	12	0
11	6	3	2	10	7	2	4	3	11	14	6	0
12	4	2	0	12	7	0	8	2	0	12	12	0
13	11	4	1	14	3	1	7	1	1	16	5	1
14	9	4	2	14	14	2	4	4	5	7	4	2
15	16	11	12	20	14	3	16	16	8	8	16	16
16	9	4	10	16	8	1	8	0	11	16	8	1

## Sheet: SUS
Participants	VR1I think that I would like touse this system frequently	VR2I found the system unnecessarilycomplex	VR3I thought the system was easyto use	VR4I think that I would need thesupport of a technical person tobe able to use this system	VR5I found the various functions inthis system were well integrated	VR6. I thought there was too muchinconsistency in this system	VR7I would imagine that most peoplewould learn to use this systemvery quickly	VR8I found the system verycumbersome to use	VR9I felt very confident using thesystem	VR10I needed to learn a lot ofthings before I could get goingwith this system	DT1I think that I would like touse this system frequently	DT2I found the system unnecessarilycomplex	DT3I thought the system was easyto use	DT4. I think that I would need thesupport of a technical person tobe able to use this system	DT5I found the various functions inthis system were well integrated	DT6I thought there was too muchinconsistency in this system	DT7I would imagine that most peoplewould learn to use this systemvery quickly	DT8I found the system verycumbersome to use	DT9I felt very confident using thesystem	DT10I needed to learn a lot ofthings before I could get goingwith this system
1	3	4	3	4	3	2	3	3	2	3	4	4	3	4	3	2	2	3	3	4
2	5	1	4	1	5	1	5	1	5	3	3	1	3	1	4	1	5	1	5	1
3	4	2	4	2	4	1	4	1	4	2	2	1	2	2	2	2	3	3	2	1
4	4	2	4	1	4	2	5	2	3	1	3	1	4	1	4	1	5	1	4	1
5	5	2	4	1	4	1	3	2	5	2	3	3	4	1	4	1	5	1	5	3
6	3	2	3	3	4	2	5	1	4	2	3	2	3	3	3	2	4	2	4	2
7	4	3	3	2	4	2	3	2	4	5	2	3	2	1	1	3	4	4	2	1
8	4	2	3	1	3	1	3	1	3	1	2	3	3	1	4	1	3	1	3	1
9	4	2	4	2	4	1	4	2	4	2	4	2	3	2	4	2	5	2	2	2
10	4	1	4	1	4	1	4	1	4	1	4	1	4	1	5	1	5	1	2	1
11	4	2	3	2	5	2	4	2	4	4	4	2	3	1	5	1	4	2	4	2
12	4	2	5	1	5	1	5	1	5	1	3	2	5	1	4	1	5	1	5	1
13	4	1	5	1	5	4	4	2	5	2	5	1	5	1	4	1	5	1	5	1
14	4	3	2	3	2	1	2	1	3	1	3	2	4	1	3	1	4	1	4	1
15	4	1	2	1	4	1	4	1	5	3	2	1	1	3	2	4	4	3	4	2
16	5	1	5	1	4	1	5	3	5	3	4	2	5	1	4	1	5	2	4	1

## Sheet: UES
Participants	VRFA-S.1	VRFA-S.2	VRFA-S.3	VRPU-S.1	VRPU-S.2	VRPU-S.3	VRAE-S.1	VRAE-S.2	VRAE-S.3	VRRW-S.1	VRRW-S.2	VRRW-S.3	DTFA-S.1	DTFA-S.2	DTFA-S.3	DTPU-S.1	DTPU-S.2	DTPU-S.3	DTAE-S.1	DTAE-S.2	DTAE-S.3	DTRW-S.1	DTRW-S.2	DTRW-S.3
1	2	3	4	3	3	4	4	4	5	5	5	4	1	5	3	2	4	3	3	4	3	5	4	4
2	4	4	4	2	3	5	3	5	4	4	3	5	1	3	4	1	2	3	2	3	2	4	3	3
3	4	4	4	2	2	4	5	4	4	4	4	4	1	4	2	4	3	4	2	4	3	3	3	2
4	4	4	4	2	3	4	4	4	5	5	4	4	1	2	2	1	2	3	2	4	2	3	3	2
5	2	3	5	1	2	4	4	4	4	4	4	4	1	4	3	1	1	1	2	2	3	4	4	3
6	1	4	1	2	3	4	4	4	4	4	4	4	1	4	2	2	4	2	3	2	3	3	3	2
7	2	4	4	2	2	4	3	4	4	4	4	4	2	2	2	3	4	4	2	2	2	4	4	2
8	3	4	3	1	2	4	4	4	3	3	3	4	1	3	2	1	2	2	3	3	3	3	3	3
9	4	4	4	3	2	4	3	4	4	4	4	4	2	4	2	4	3	4	3	3	2	4	4	2
10	4	4	4	1	3	5	4	4	5	5	5	5	4	4	4	1	1	1	5	4	4	4	4	5
11	5	4	4	2	2	4	5	5	4	4	5	5	4	4	4	2	1	2	2	3	3	4	4	4
12	2	5	5	2	1	5	3	5	5	5	4	5	2	1	3	3	1	1	3	2	3	5	4	3
13	4	4	4	1	1	5	5	5	5	5	5	5	1	3	4	1	1	1	4	5	5	5	5	5
14	5	5	4	1	2	5	5	5	5	5	5	5	4	4	4	2	2	3	4	3	4	3	3	3
15	5	5	5	2	1	4	2	4	4	4	5	4	5	4	5	5	4	5	1	1	2	4	3	3
16	5	4	5	2	2	5	5	4	5	5	5	5	3	3	4	1	1	1	3	3	2	5	4	4

## Sheet: SSQ
Participants	pre1	pre2	pre3	pre4	pre5	pre6	pre7	pre8	pre9	pre10	pre11	pre12	pre13	pre14	pre15	pre16	post1	post2	post3	post4	post5	post6	post7	post8	post9	post10	post11	post12	post13	post14	post15	post16
1	1	2	1	1	1	1	2	1	2	1	1	1	1	1	1	1	2	2	1	3	1	1	2	1	2	1	1	1	1	1	1	1
2	1	1	1	1	1	1	1	1	1	1	1	1	1	1	1	1	1	1	1	1	1	1	1	1	1	1	1	1	1	1	1	1
3	1	1	1	1	1	1	1	1	1	1	1	1	1	1	1	1	1	1	1	2	1	1	2	1	1	1	2	1	1	1	1	1
4	1	1	1	1	1	2	2	1	1	1	1	1	1	2	2	1	1	1	1	1	1	1	1	1	1	1	1	1	1	1	1	1
5	1	2	1	2	1	1	1	1	1	2	1	2	1	1	1	1	1	1	1	2	1	1	1	1	1	1	1	1	1	1	1	1
6	1	1	1	1	1	1	2	1	1	1	1	1	1	1	2	1	1	1	1	1	1	1	2	1	1	1	1	1	1	1	1	1
7	1	1	1	1	1	1	1	1	1	1	1	1	1	1	1	1	1	2	1	2	1	1	1	1	2	2	1	1	1	1	1	1
8	1	1	1	2	2	1	2	1	1	1	1	2	2	1	2	1	1	1	1	2	1	1	3	1	1	1	1	1	1	1	1	1
9	1	2	1	2	1	1	1	1	1	2	1	2	1	1	1	1	1	2	1	1	1	1	1	1	2	1	1	1	2	1	1	1
10	1	1	1	1	1	1	1	1	1	1	1	1	1	1	1	1	2	2	1	3	1	1	1	1	1	1	1	2	2	2	1	1
11	1	1	1	1	1	1	1	1	1	1	1	1	1	1	1	1	1	1	1	1	1	1	3	1	1	1	1	1	1	1	1	1
12	1	2	1	1	1	1	1	1	1	2	1	-2	1	1	1	1	1	1	1	1	1	1	1	1	1	1	1	1	1	1	1	1
13	1	2	1	1	1	1	1	1	1	1	1	1	1	1	1	1	1	1	1	1	1	1	1	1	1	1	2	1	1	1	1	1
14	1	2	1	2	1	1	1	1	1	1	2	1	1	1	1	1	1	1	1	1	1	1	1	1	1	1	1	1	1	1	1	1
15	1	1	1	2	1	1	1	1	1	1	1	1	1	1	1	1	1	1	1	2	1	1	1	1	1	1	1	1	1	1	1	1
16	1	2	1	2	1	1	1	1	1	1	1	1	1	1	1	1	1	2	1	2	1	1	1	1	1	1	1	1	1	1	1	1
