# Supplementary material
Source: ML conference proceedings conference paper supplement (https://openreview.net/forum?id=eivmdSj9u1)
Supplement: supplementary_material [file UserStudy1Data.xlsx]

## Sheet: Subject Information
Participants	Gentle	Educational background	Age	Major	Any professional background (or experience) in data visualization？	Familiarity with Sankey Diagrams	Experience with VR Devices	Experimental Order
1	Fe	Postgraduate and above	24	Industrial Design Engineering	No	Understand the basic concepts and have used it	A few times (up to 5 times)	3D-2D
2	Male	bachelor	22	Computer Science and Technology	Yes	Understand the basic concepts and have used it	A few times (up to 5 times)	2D-3D
3	Male	Postgraduate and above	24	Design	Yes	Use it frequently	Some experience (5-10 times)	2D-3D
4	Fe	Postgraduate and above	23	Industrial Design Engineering	Yes	Use it frequently	A few times (up to 5 times)	3D-2D
5	Male	Postgraduate and above	24	Software Engineering	Yes	Never heard of it	A few times (up to 5 times)	2D-3D
6	Male	Postgraduate and above	23	Design	No	Heard of it, have seen it	None	3D-2D
7	Fe	Postgraduate and above	35	Design	Yes	Understand the basic concepts and have used it	A few times (up to 5 times)	2D-3D

## Sheet: Low-density
2D
Participants	Task1	Time1	SEQ1	Task2	Time2	SEQ2	Task3	Time3	SEQ3	Task4	Time4	SEQ4	Task5	Time5	SEQ5
1	1	15.57	4	1	11.5	7	1	11.85	7	1	8.89	7	1	7.81	7
2	1	35.04	7	1	12.4	7	1	24.57	6	1	27	6	1	15.21	6
3	1	19.67	7	1	15.06	6	1	27.77	6	1	26.17	6	1	10.23	6
4	1	25.18	6	1	12.77	7	1	11.58	7	1	14.37	6	1	8.55	7
5	1	11.01	7	1	7.51	6	1	9.95	6	1	18.88	5	1	7.2	6
6	0	52.96	5	1	16.97	7	1	22.04	6	1	31.2	6	1	17.2	6
7	1	17.73	5	1	13.51	6	1	41.2	5	1	14.8	6	1	10.3	7
3D
Participants	Task1	Time1	SEQ1	Task2	Time2	SEQ2	Task3	Time3	SEQ3	Task4	Time4	SEQ4	Task5	Time5	SEQ5
1	1	21.37	5	1	9.87	7	1	12.03	7	0	17.92	3	1	8.35	6
2	1	29.71	5	1	14.11	7	1	21.33	6	0	33.89	4	1	8.83	6
3	1	28.77	5	1	11.95	6	1	12.3	7	0	23.73	6	1	8.62	7
4	1	46.99	5	1	22.16	7	1	27.96	7	1	18.8	6	1	10.63	6
5	1	19.54	7	1	15.01	5	1	25.42	6	0	17.93	6	1	7.02	7
6	0	49.12	5	1	27.63	4	1	41.97	5	0	44.22	3	1	46.92	3
7	1	12.31	5	1	14.76	6	1	19.23	6	1	20.38	5	1	10.36	7
Ps: 1 means correct; 0 means wrong

## Sheet: High-density
2D
Participants	Task1	Time1	SEQ1	Task2	Time2	SEQ2	Task3	Time3	SEQ3	Task4	Time4	SEQ4	Task5	Time5	SEQ5
1	1	11.01	6	1	19.74	3	1	19.91	3	0	47.61	1	0	26.96	2
2	1	22.56	6	1	44	2	1	28.62	6	1	23.21	6	0	44.12	2
3	1	24.66	5	1	85.3	4	1	30.15	6	1	72.27	5	0	19.29	6
4	1	17.8	6	1	18.77	5	1	24.84	5	1	47.7	4	1	12.31	5
5	1	55.2	4	0	22	4	1	26.04	5	0	35.17	3	0	10.27	7
6	1	21.1	6	0	30.81	6	1	30.47	5	1	46.62	3	1	53.02	1
7	0	32.84	4	0	36.91	3	1	18.62	6	1	54.7	4	1	10.91	7
3D
Participants	Task1	Time1	SEQ1	Task2	Time2	SEQ2	Task3	Time3	SEQ3	Task4	Time4	SEQ4	Task5	Time5	SEQ5
1	1	20.13	6	1	18.49	7	1	19.5	6	1	15.32	7	1	8.86	7
2	1	45.18	4	1	20.79	6	1	33.39	6	1	30.07	6	1	21.75	6
3	1	29.68	5	1	25.51	6	1	31.34	6	1	42.09	5	1	9.93	7
4	1	50.59	5	1	19.24	6	1	21.52	6	1	27.33	5	1	18.78	5
5	1	19.54	6	1	15.01	7	1	25.42	6	1	29.9	5	1	7.12	7
6	1	53.03	5	1	16.76	6	1	38.38	5	1	42.42	4	1	13.79	7
7	1	45.21	1	1	11.51	6	1	36.13	6	1	32.23	6	1	18.34	7
Ps: 1 means correct; 0 means wrong
